# Supplementary material for: The Role of DCT in HPV16 Infection of HaCaTs
Source: PubMed Central journal article supplement (PMC5240977; doi:10.1371/journal.pone.0170158), 2017-01-17

**Table S1** HaCaT cells were plated on 12-well-plates at equal densities for each experiment. The next day, cells were transfected with control or DCT siRNA. siRNA transfection was repeated on the following day. 72 hours after first transfection, the cells were stained with trypan blue and counted using a hemocytometer.

|              | siRNA   | Number of cells |
|--------------|---------|-----------------|
| Experiment 1 | Control | 2620000         |
|              | DCT     | 1500000         |
| Experiment 2 | Control | 1920000         |
|              | DCT     | 1100000         |
| Experiment 3 | Control | 2680000         |
|              | DCT     | 1000000         |
| Experiment 4 | Control | 6840000         |
|              | DCT     | 3600000         |
| Experiment 5 | Control | 4200000         |
|              | DCT     | 1260000         |

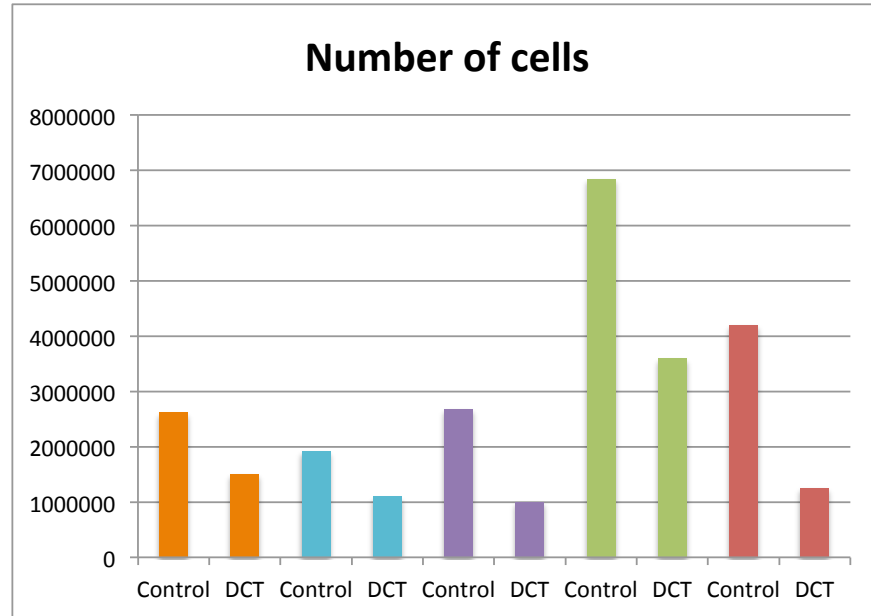

Supplement: pone.0170158.s005.pdf [file pone.0170158.s005.pdf]
